# Dynamic noise estimation: A generalized method for modeling noise in sequential decision-making behavior

Jing-Jing Li<sup>1</sup>, Chengchun Shi<sup>2</sup>, Lexin Li<sup>1,3</sup>, Anne Collins<sup>1,4\*</sup>

**1** Helen Wills Neuroscience Institute, University of California, Berkeley, Berkeley, California, United States

**2** Department of Statistics, London School of Economics and Political Science, London, United Kingdom

**3** Department of Biostatistics and Epidemiology, University of California, Berkeley, Berkeley, California, United States

**4** Department of Psychology, University of California, Berkeley, Berkeley, California, United States

\* [annecollins@berkeley.edu](mailto:annecollins@berkeley.edu)

## Abstract

Computational cognitive modeling is an important tool for understanding the processes supporting human and animal decision-making. Choice data in sequential decision-making tasks are inherently noisy, and separating noise from signal can improve the quality of computational modeling. Common approaches to model decision noise often assume constant levels of noise or exploration throughout learning (e.g., the  $\epsilon$ -softmax policy). However, this assumption is not guaranteed to hold – for example, a subject might disengage and lapse into an inattentive phase for a series of trials in the middle of otherwise low-noise performance. Here, we introduce a new, computationally inexpensive method to dynamically infer the levels of noise in choice behavior, under a model assumption that agents can transition between two discrete latent states (e.g., fully engaged and random). Using simulations, we show that modeling noise levels dynamically instead of statically can substantially improve model fit and parameter estimation, especially in the presence of long periods of noisy behavior, such as prolonged attentional lapses. We further demonstrate the empirical benefits of dynamic noise estimation at the individual and group levels by validating it on four published datasets featuring diverse populations, tasks, and models. Based on the theoretical and empirical evaluation of the method reported in the current work, we expect that dynamic noise estimation will improve modeling in many decision-making paradigms over the static noise estimation method currently used in the modeling literature, while keeping additional model complexity and assumptions minimal.

## Author summary

In behavioral modeling, the amount of decision noise in choices is often assumed to be constant, or “static”, for each individual or session. However, this assumption may not hold when there are variations in noise, such as when subjects occasionally disengage and make random choices. To address this issue, we introduce a new, computationally inexpensive method: dynamic noise estimation. Our method estimates the levels of decision noise in choices on a trial-by-trial basis, allowing for changes in noise levels

throughout the experiment. We thoroughly evaluate the benefits of dynamic noise estimation by comparing it to its static counterpart on simulated and real data from various species, age groups, behaviors, cognitive processes, and computational models. Our findings show that dynamic noise estimation, with only one extra parameter, can improve model fit and parameter estimation compared to the static method. Moreover, dynamic noise estimation is versatile: it can be applied to any sequential decision-making models with analytical likelihoods and easily incorporated into existing model-fitting procedures, including maximum likelihood estimation and hierarchical Bayesian methods.

## Introduction

Computational modeling has helped cognitive scientists, psychologists, and neuroscientists to quantitatively test theories by translating them into mathematical equations that yield precise predictions [1, 2]. Cognitive modeling often requires computing how well a model fits to experimental data. Measuring this fit – for example, in the form of model evidence [3] – enables a quantitative comparison of alternative theories to explain behavior. Measuring model fit to the data as a function of model parameters helps identify the best-fitting parameters for a given dataset, via an optimization procedure over the fit measure (typically negative log-likelihood) in the space of possible parameter values. When fitted as a function of experimental conditions, model parameter estimation can help explain how task manipulations modify cognitive processes [4]; when fitted at the individual level, estimated model parameters can help account for individual differences in behavioral patterns [5]. Moreover, recent work has applied cognitive models in the rapidly growing field of computational psychiatry to quantify the functional components of psychiatric disorders [6]. Importantly, cognitive modeling is particularly useful for explaining choice behavior in decision-making tasks – it reveals links between subjects’ observable choices and putative latent internal variables such as objective or subjective value [7], strength of evidence [8], and history of past outcomes [9]. This link between internal latent variables and choices is made via a *policy*: the probability of making a choice among multiple options based on past and current information.

An important feature of choice behavior produced by biological agents is its inherent noise, which can be attributed to multiple sources including inattention [10, 11], stochastic exploration [12], and internal computation noise [13]. Choice randomization can be adaptive, as it encourages exploration, which is essential for learning [14]. Exploration can come close to optimal performance if implemented correctly [15–17]. However, the role of noise is often downplayed in computational cognitive models, which usually emphasize noiseless information processing over internal latent variables – for example, in reinforcement learning, how the choice values are updated with each outcome [18]. A common approach to modeling noise in choice behavior is to include simple parameterized noise into the model’s policy [2]. For example, a greedy policy, which chooses the best option deterministically, can be “softened” by a logistic or softmax function with an inverse temperature parameter,  $\beta$ , such that choices among more similar options are more stochastic than choices among more different ones. Another approach is to use an  $\epsilon$ -greedy policy, where the noise level parameter,  $\epsilon$ , weighs a mixture of a uniformly random policy with a greedy policy. This approach is motivated by a different intuition: that lapses in choice patterns can happen independently of the specific internal values used to make decisions. Multiple noise processes can be used jointly in a model when appropriate [19].

Failure to account for a noisy choice process in modeling could lead to under- or over-emphasis of certain data points, and thus inappropriate conclusions [20, 21].

However, commonly used policies with noisy decision processes share strong assumptions. In particular, they assume that the levels of noise in the policy are fixed, or “static”, over the duration of the experiment. This assumption could hold for some sources of noise, such as computation noise, but many other sources are not guaranteed to generate consistent levels of noise. For instance, a subject might disengage during some periods of the experiment, but not others. How much subjects explore through choice randomization could also vary over time. Therefore, such models with static noise estimation might fail to capture the variance in noise levels, which can impact the quality of computational modeling.

To resolve this issue, we introduce a dynamic noise estimation method that estimates the probability of noise contamination in choice behavior trial-by-trial, allowing it to vary over time. Fig 1A illustrates examples of static and dynamic noise estimation on human choice behavioral data from [4]. The probabilities of noise inferred by the static and dynamic methods are shown in conjunction with choice accuracy. In this example, choice accuracy drops steeply to a random level (0.33) around Trial 350, indicating an increased probability of noise contamination. This change is captured by dynamic noise estimation but not the static method.

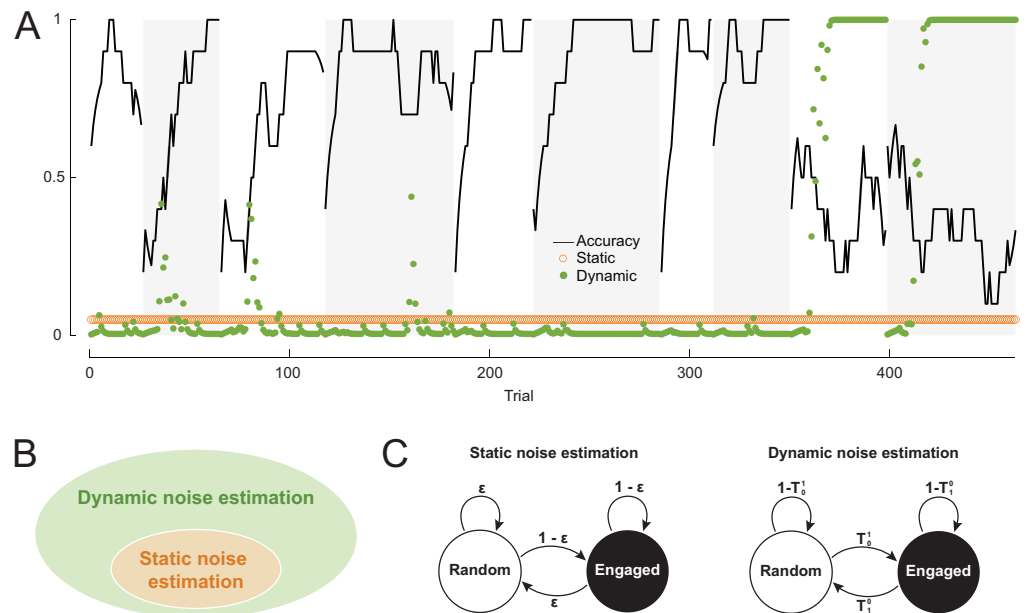

**Fig 1. Dynamic noise estimation computes the noise levels in choices trial-by-trial.** A: Example noise levels in choice behavioral data estimated by static and dynamic noise estimation methods. Background shading indicates the block design of the experiment; black line is smoothed accuracy. Data is an example subject from [4]. B: Static noise estimation is a special case of dynamic noise estimation subject to an additional constraint. C: Hidden Markov models representing static and dynamic noise estimation with transition probabilities between latent states.

Our dynamic noise estimation method makes looser assumptions than static noise estimation, making it suitable to solve a broader range of problems (Fig 1B). Specifically, a policy with dynamic noise estimation models the presence of random noise as the result of switching between two latent states – the *random* state and the *engaged* state – that correspond to a uniformly random, noisy policy and some other decision policy assuming full task engagement (e.g., an attentive, softmax policy). We assume that a hidden Markov process governs transitions between the two latent states

with two transition probability parameters,  $T_0^1$  and  $T_1^0$ , from the random to engaged state and vice versa. Note that static noise estimation can be formulated under the same binary latent state assumption, with the additional constraint that the transition probabilities must sum to one, making it a special case of dynamic noise estimation (see Materials and methods for proof). The hidden Markov model of dynamic noise estimation captures the observation that noise levels in decision-making tend to be temporally autocorrelated, which may be a reflection of an evolved expectation of temporally autocorrelated environments [22].

We show that noise levels can be inferred dynamically trial-by-trial in sequential decision-making. On each trial, the model infers the probability of the agent being in each latent state using observation, choice, and reward (if applicable) data. It estimates the choice probability as a weighted average of decisions generated by the random policy and the engaged policy, which is then used to estimate the likelihood. Therefore, dynamic noise estimation can be incorporated into any decision-making models with analytical likelihoods. Model parameters can be estimated using procedures that optimize the likelihood or its posterior distribution, including maximum likelihood estimation [23] and hierarchical Bayesian methods [24].

## Results

### Theoretical benefits of dynamic noise estimation

We first performed a simulation study to illustrate the benefits of our dynamic noise estimation approach. By definition, we expected dynamic noise estimation to explain choice data better than static noise estimation when noise levels are highly variable across trials. To demonstrate it, we compared models implemented with static and dynamic noise estimation mechanisms on simulated data in a two-alternative, probabilistic reversal learning task widely used to assess cognitive flexibility [25], in which the correct action switched every 50 trials (Fig 2). In the simulations, we used the static model to generate choice data, in which we included periods of lapses into random behavior (e.g., due to inattention) by making the agent choose randomly between the actions.

After fitting the models to the data, we simulated behavior using the best fit parameters of both models and compared their learning curves to the data as a validation step. Fig 2A shows the learning curves of two example subjects and their best fit models. In both cases, the subjects performed at chance level (accuracy = 0.5) during lapses and better than chance otherwise. The phasic fluctuations of choice accuracy were synchronized to the reversals. The learning curves generated by the dynamic model matched the data substantially better than the learning curves of the static model. Critically, this is true both during and outside of lapses: having to account for the lapse periods, the static noise model inferred too much noise overall, which contaminated the engaged periods. Thus, the static noise model overestimates performance in disengaged periods, and underestimates it in engaged ones; by contrast, the dynamic noise model accurately captures the behavior in both situations.

To further understand how the duration of lapse interacted with the effectiveness of static and dynamic noise estimation, we varied the lapse duration in the simulations. Fig 2B shows how the amounts of deviation between the learning curves of the models and data (measured by the mean squared error between the curves per trial) changed as the duration of lapse increased. Overall, the model with dynamic noise estimation was able to replicate behavior better than the static model, as the learning curves of the former matched the data more closely. Although lapses only weakly affected the fit of the dynamic noise model, the static model fitted worse in the presence of lapses,

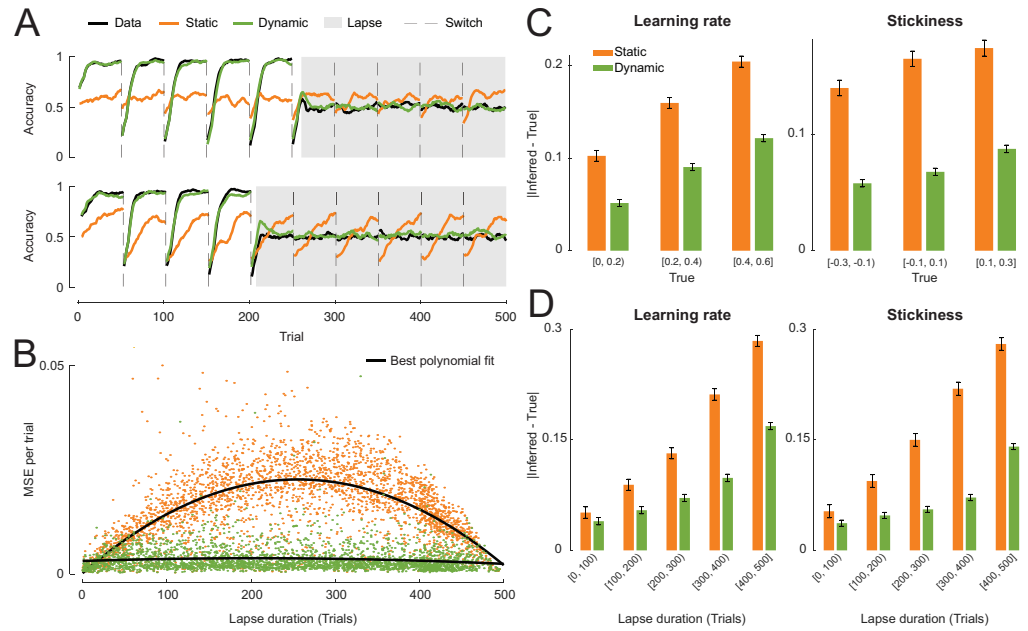

**Fig 2. Dynamic noise estimation outperforms static noise estimation when subjects lapse into random behavior.** A: Example learning curves of two simulated subjects and their best fit static and dynamic noise estimation models; since the noise levels are fixed in the static model, the model overestimates performance in disengaged periods, and underestimates it in engaged ones. B: The deviations of the best fit models' learning curves from the data quantified by the mean squared error per trial, as a function of lapse duration. C,D: The absolute differences between the true and inferred model parameters, over true parameter value (C) and lapse duration (D).

especially when lapse and non-lapse periods were intermixed in the learning trajectory. 115

Next, we tested how well the true parameters used to generate the data could be recovered by the static and dynamic models (Fig 2C). Both learning parameters shared by the models (learning rate and choice stickiness) were better recovered by the dynamic model, as measured by the absolute amounts of differences between the true and recovered (best fit) parameters. The advantage of the dynamic model in parameter recovery persisted over the whole range of parameter values sampled in the simulations and various lengths of lapses, with weaker effects when lapses were short relative to the duration of the experiment (less than 20%). 116  
117  
118  
119  
120  
121  
122  
123

To verify that including dynamic noise estimation would not undermine a model's robustness, we performed validation and recovery analyses on data simulated with the dynamic noise model in the same probabilistic reversal task environment used in the previous simulations. In model validation, the dynamic model reproduced behavior more closely than the static model in both the engaged state and the random state: the dynamic noise model showed much more sensitivity to the latent state than the static noise model. (Fig 3A). This suggests that fitting a model with static noise estimation when the underlying noise mechanism of the data is dynamic could lead to inaccurate interpretations of the behavior and model. 124  
125  
126  
127  
128  
129  
130  
131  
132

Furthermore, we confirmed that the prediction probabilities of the latent states and model parameters were recoverable by fitting the dynamic model to the simulated data to infer the quantities of interest. The prediction probability of the engaged state,  $\lambda(1)$ , was perfectly recovered across its range of values (Fig 3B). The inferred or recovered values of  $\lambda(1)$  formed a symmetric, bimodal distribution with peaks near 0 and 1, 133  
134  
135  
136  
137

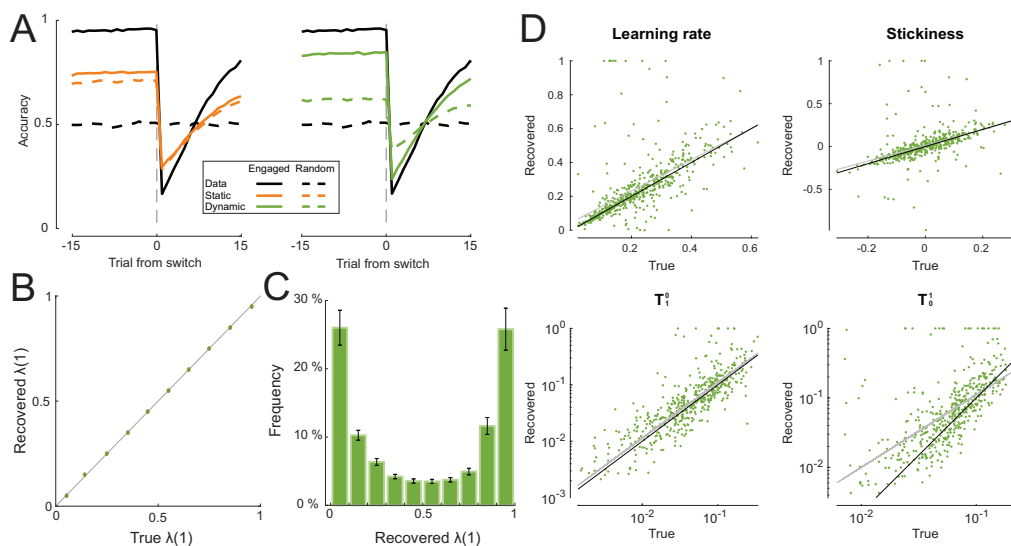

**Fig 3. The dynamic noise estimation model validates and recovers robustly.**

A: Validation of best fit static and dynamic noise models against simulated data using learning curves around switches for both engaged and random trials. B: The recovered prediction probability of the engaged state,  $\lambda(1)$ , over the true prediction probability used to simulate the data. C: The distribution of the recovered prediction probability. D: Recovered model parameters against their true values. In each plot, the black line is the least squares fit of the points and the grey line is the identity line for reference.

suggesting that both latent states were visited equally frequently and that the model was confident, for the majority of the time, that the agent was in either latent state (Fig 3C). The true values of all model parameters were recoverable through fitting (Fig 3D).

### Empirical evaluation of dynamic noise estimation

The above analyses based on controlled simulations showed that, theoretically, dynamic noise estimation could substantially improve model fit and parameter estimation, especially in the presence of prolonged lapses. We next tested the method on empirical datasets to verify whether and to what extent this conclusion stands when the data is collected from real animal and human subjects while the true generative model is unknown. To help set fair expectations for the applications of dynamic noise estimation in practice, we thoroughly evaluated the method on four published datasets featuring diverse species, age groups, task designs, behaviors, cognitive processes, and computational models. Table 1 summarizes the population, task, and model information about these datasets.

For each dataset, we used either the winning model in the original research article or an improved model from later work. We implemented and compared two versions of each model: one with static noise estimation and one with dynamic noise estimation. The models were fitted on each individual's choice data using maximum likelihood estimation for simplicity, although the noise estimation methods are also compatible with more complex likelihood-based fitting procedures. The fitted models were compared using the Akaike Information Criterion (AIC) [31], since it yielded better model identification than the Bayesian Information Criterion (BIC; S1 Fig). Fig 4 shows the model-fitting results at both the individual and group levels. To compare the models at the group level, we report the p-values of one-tailed Wilcoxon signed-rank tests with the alternative hypothesis that the AIC values of the dynamic model were

**Table 1. Summary of empirical datasets.**

| Dataset               | Population                  | Task                                          | Model                                                           |
|-----------------------|-----------------------------|-----------------------------------------------|-----------------------------------------------------------------|
| Dynamic Foraging [26] | Mice                        | Two-armed bandits with probabilistic reversal | Reinforcement learning with dynamic learning rates              |
| IGT [27]              | Young and old adult humans  | Iowa gambling task                            | A hybrid of exploitation and exploration processes [28]         |
| RLWM [29]             | Adult humans                | Reinforcement learning and working memory     | A hybrid of reinforcement learning and working memory processes |
| 2-step [30]           | Developing and adult humans | Two-step task                                 | A hybrid of model-based and model-free learning processes       |

lower than the AIC values of the static model. Additionally, we report the protected exceedance probability (pxp) [32] of the dynamic model. At the group level, dynamic noise estimation significantly improved model fit compared to static noise estimation on the Dynamic Foraging ( $\Delta\text{AIC} = -8.31$ ,  $p = 0.0002$ ,  $\text{pxp} = 0.96$ ) and IGT ( $\Delta\text{AIC} = -2.79$ ,  $p = 3.48 \times 10^{-12}$ ,  $\text{pxp} = 1.00$ ) datasets. This populational difference was present but not statistically significant on the RLWM ( $\Delta\text{AIC} = -1.43$ ,  $p = 0.83$ ,  $\text{pxp} = 0.38$ ) and 2-step ( $\Delta\text{AIC} = -3.04$ ,  $p = 0.47$ ,  $\text{pxp} = 0.44$ ) datasets.

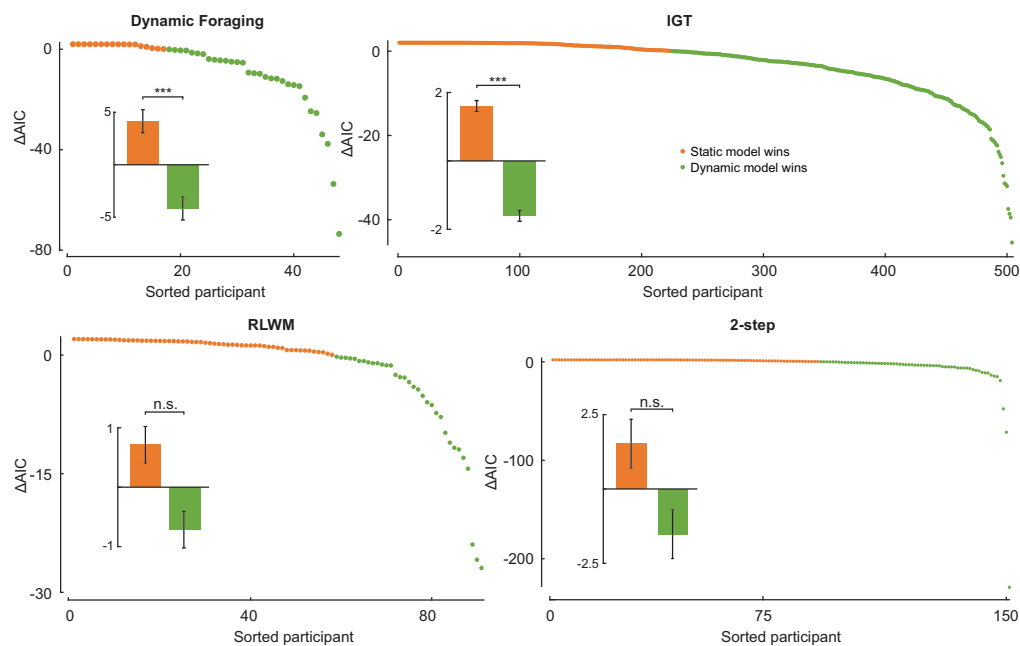

**Fig 4. Dynamic noise estimation can improve model fit on empirical data.** Evaluation of model fit on four empirical datasets based on the AIC. In each panel, the plot shows the difference in AIC for each individual between the models with static and dynamic noise estimation mechanisms. A positive value (orange) indicates that the static model is favored and a negative value (green) means that the dynamic model is preferred by the criterion. The inset shows the mean difference in AIC between the models at the group level. Significance levels are defined as \*\*\* if  $p < 0.001$ , \*\* if  $p < 0.01$ , \* if  $p < 0.05$ , and n.s. otherwise.

As detailed in Materials and methods, the likelihood of the dynamic noise estimation model should not be worse than that of the static model, since the latter is equivalent to a special case of the former. This relationship was confirmed by the fitting results on

all four empirical datasets: for individuals whose data were best explained by the static model, the  $\Delta\text{AIC}$  values were upper-bounded by 2, which corresponded to the penalty incurred by the extra parameter in the dynamic model. In other words, the dynamic model did not impair likelihood estimation in practice, which aligned with our prediction.

We additionally validated both models against behavior and found no significant differences between the static and dynamic noise models (S2 Fig). We verified that the quantities specific to dynamic noise estimation, including the prediction probability and noise parameters, were recoverable (S3 Fig). The distributions of the inferred prediction probability of the engaged state,  $\lambda(1)$ , were heavily right-skewed and long-tailed. This indicates a scarcity of data in the random state, which likely led to a lack of transitions from the random state to the engaged state and, thus, underpowered the recovery of  $T_0^1$ , causing it to be noisier than the recovery of  $T_1^0$ .

Knowing that likelihood favors the dynamic model over the static model, the remaining questions are: *how* does this improvement manifest, and does it impact the insights we can gain from computational modeling? To address these questions, we compared the values of best fit parameters between both models (Fig 5). On the Dynamic Foraging dataset, the values of the positive learning rate and forgetting rate parameters increased at the group level (two-tailed Wilcoxon signed-rank test  $p = 7.56 \times 10^{-7}$  for positive learning rate and  $p = 2.66 \times 10^{-5}$  for forgetting rate). This suggests that dynamic noise estimation helped the model capture faster learning dynamics in the task, which may have led to the improved fit. On the RLWM dataset, the distributions of the bias ( $p = 0.0016$ ) and stickiness ( $p = 0.0022$ ) parameters both shifted in the positive direction. On the 2-step dataset, the softmax inverse temperature parameter for the second-stage choice was also estimated to increase after incorporating dynamic noise estimation into the model ( $p = 8.8 \times 10^{-6}$ ). Similarly, on the IGT dataset, the softmax inverse temperature parameter increased significantly ( $p = 2.78 \times 10^{-7}$ ). An increase in the inverse temperature parameter can be interpreted as capturing a policy that is less noisy and more sensitive to internal variables; these results highlight the success of the dynamic noise model in identifying noisy time periods, and decontaminating on-task periods from their influence.

Besides the policy parameters, the noise parameters also showed distributional differences that were correlated with improved fit. Fig 6 illustrates the relationship between the static noise parameter,  $\epsilon$ , and the dynamic noise parameter,  $T_1^0$ , on all four empirical datasets. For individuals whose data were better explained by the static noise model according to the AIC,  $T_1^0$  and  $\epsilon$  were estimated to take on comparable and highly correlated values (Dynamic Foraging: Kendall's  $\tau = 0.84$ ,  $p = 5.67 \times 10^{-5}$ ; IGT:  $\tau = 0.82$ ,  $p = 1.23 \times 10^{-67}$ ; RLWM:  $\tau = 0.89$ ,  $p = 6.78 \times 10^{-23}$ ; 2-step:  $\tau = 0.84$ ,  $p = 1.42 \times 10^{-26}$ ). This observation was in line with our expectation: when the static model was favored by the AIC, the difference in likelihoods between both models must be smaller than the penalty incurred by the extra parameter in the dynamic model (2 for AIC), which means both models fitted similarly to the data. On the other hand, when the dynamic model outperformed the static model,  $T_1^0$  was estimated to be lower than  $\epsilon$  (Dynamic Foraging: one-tailed Wilcoxon signed-rank test  $p = 0.031$ ; IGT:  $p = 4.90 \times 10^{-8}$ ; RLWM:  $p = 0.0072$ ; 2-step:  $p = 0.0017$ ). A similar, though noisier, relationship between  $T_0^1$  and  $1 - \epsilon$  was also observed on all empirical datasets (S4 Fig). The lower values of the dynamic noise parameters than the static averages of noise levels indicate that the dynamic model successfully separated noisy trials from engaged trials.



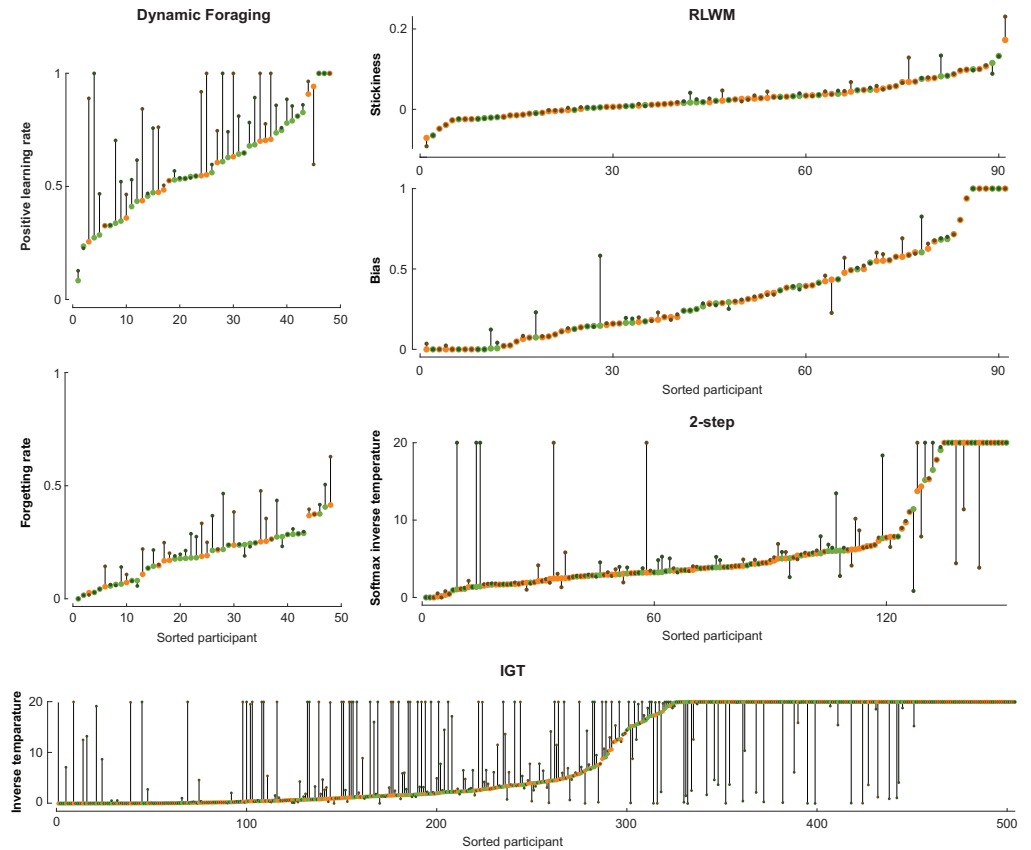

**Fig 5. Dynamic noise estimation can lead to shifted parameter fit.** Changes in best fit parameter values between the models with static and dynamic noise estimation mechanisms for each individual. Individual data points are color-coded according to the winning model by AIC: orange if the static model fitted better and green if the dynamic model fitted better.

## Discussion

Our results show that dynamic noise estimation can improve model fit and parameter estimation both theoretically and empirically, qualifying it as a candidate alternative to static noise estimation, despite one additional model parameter. Our approach is especially powerful and effective in the presence of lapses, since it provides a better account for the variance in the noise levels of choice behavior. Additionally, it is generalizable and versatile: it can be applied to any decision policies with tractable likelihoods and be incorporated into any likelihood-based parameter estimation procedures, making it an accessible and computationally lightweight extension to many decision-making models.

Another benefit of dynamic noise estimation is that it could help avoid excluding whole individuals or sessions due to poor performance, thus improving data efficiency. Dynamic noise estimation takes effect by identifying periods of choice behavior that are better explained by random noise than the learned policy (e.g., lapses). The likelihoods of these noisy periods are lower-bounded by that of the random policy, which limits the impacts of these trials on the estimation of the overall likelihood and model parameters. Thus, dynamic noise estimation can mitigate the effects of noise contamination on model-fitting. On the contrary, static noise estimation does not provide a meaningful

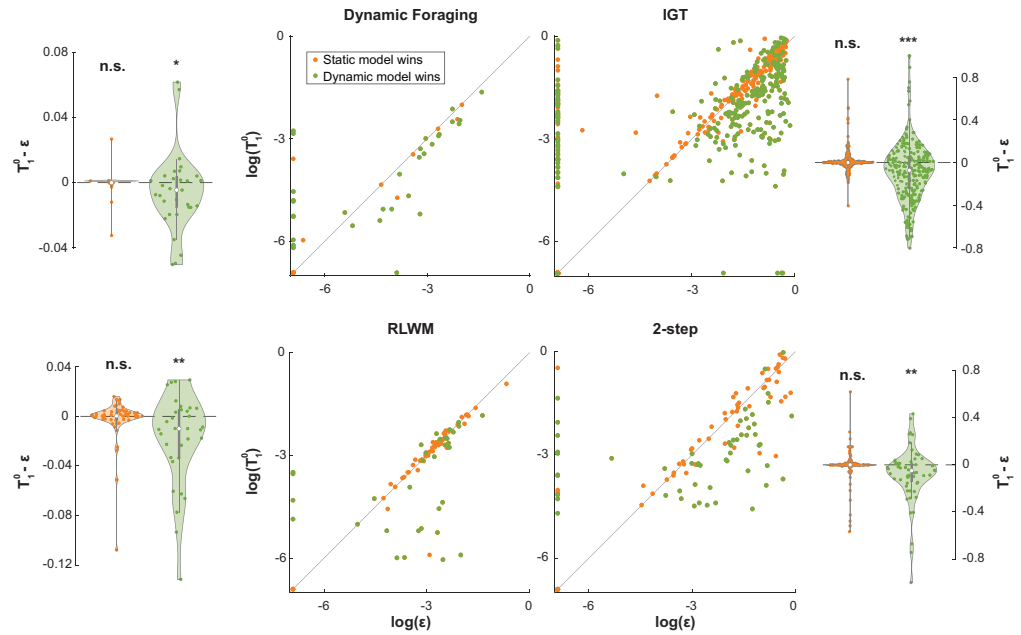

**Fig 6. Improved fit by dynamic noise estimation is correlated to decreased noise parameter estimates.** The dot plots in the center illustrate the relationship between the best fit dynamic and static noise parameters ( $T_1^0$  and  $\epsilon$ ) on log scale, with each dot representing an individual. The violin plots on the sides show the differences between the best fit dynamic noise parameter,  $T_1^0$ , and static noise parameter,  $\epsilon$ , at the individual and group levels.

lower bound to the likelihood of noisy data, such that relatively noisy parts of the behavior may heavily bias parameter estimation. Thus, using dynamic instead of static noise estimation could allow fewer individuals to be excluded due to noisy behavior. For example, without dynamic noise estimation, the last two blocks in Fig 1A might lead to the exclusion of this subject by some performance-based criterion. However, dynamic noise estimation might allow fitting of the whole individual's data with minimal contamination due to the noisy blocks. This outcome can be particularly desirable when data collection is challenging or expensive, such as in clinical populations, neuroimaging experiments, and time-consuming tasks.

Compared to other recent work identifying discrete latent policy states, namely the GLM-HMM model [33], our method has the advantages of simplicity, accessibility, and versatility. Although GLM-HMM encompasses a larger model space and makes more flexible assumptions about latent states than our approach, it additionally assumes that all decision policies can be described as generalized linear models, which limits its applications to descriptive models rather than cognitive process models. The parameter inference procedure for GLM-HMM does not generalize trivially when this assumption is challenged (e.g., with process models such as reinforcement learning). On the other hand, our likelihood estimation procedure for dynamic noise estimation can be readily plugged into any existing likelihood-based optimization procedure to fit both descriptive models and process models.

Dynamic noise estimation assumes that making choices randomly and according to the learned policy are distinct, binary latent states. Biologically, this assumption aligns with an established literature on how norepinephrine modulates attention, a major contributor to varying noise levels: the phasic or tonic mode of activity of the noradrenergic locus coeruleus system closely correlates to good or poor task

performance [34,35]. It is worth noting that the binary assumption of the latent states may not always be accurate. Nonetheless, it is a less strict assumption than that of static noise estimation, which additionally assumes that the probability of transitioning into each latent state is independent of the current state. Thus, although dynamic noise estimation may be limited by its binary latent state assumption, it is still more suitable to solve a broader range of problems than static noise estimation.

A potential extension to the likelihood estimation procedure derived in the current work is to apply it on policy mixtures in a broader sense – i.e., hidden Markov models that involve two or more latent states of any eligible policies – rather than a fixed random policy and some other decision policy (e.g., softmax) as presented in the current work. Although this approach might lead to applications beyond noise estimation, users should carefully check that the assumptions of our method are satisfied by the data and model. Specifically, the hidden Markov over two latent states assumption in our method assumes that the agent can only occupy one latent state at any given time, and that they tend to remain in a state for some trials, which may not be appropriate for all policy mixture models. For example, the RLWM model [36] is a mixture of a reinforcement learning process and a working memory process, which could technically be modeled as two latent policy states. However, the latent state occupancy assumption is biologically implausible here, since reinforcement learning and working memory are likely to operate concurrently, and participants are not likely to transition from one policy to the other across sequences of trials.

A limitation to our approach is that we assume that the latent state only affects the policy, but not the underlying process: in the random state, information is still being processed (e.g., action value updating), but not used for decision-making. Removing this assumption can significantly complicate the inference process over the latent state by making the likelihood intractable, and thus making the inference process much less accessible. Addressing this limitation will be an important direction for future work.

Future work should also further validate dynamic noise estimation experimentally, for example, by comparing estimated prediction probabilities to an independent measure of attention or task-engagement and testing whether inferred latent states capture this measure. Possible approaches include to measure task-engagement based on choice behavior [37], reaction time [38], pupil size [39], and event-related brain potentials [40]. If the prediction probability can indeed serve as an objective measure of attention to the task, it could be applied to behaviorally characterize attentional mechanisms in computational psychiatry [41], especially for patients with attention-deficit/hyperactivity disorder (ADHD) [42]. Another potential future direction is to explore whether dynamic noise estimation changes the interpretations of behaviors and models when applied to other decision policies than the softmax policy, such as Thompson sampling [16] and the upper confidence bound algorithm [43].

In conclusion, our dynamic noise estimation method promises potential improvements over the static noise estimation method currently used in the modeling literature of decision-making behavior. Dynamic noise estimation enables us to capture different degrees of task-engagement in different task periods, limiting contamination of model-fitting by noisy periods, without requiring ad-hoc data curating. Based on the theoretical and empirical evaluation of the method reported in the current work, we expect that dynamic noise estimation in modeling choice behavior will strengthen modeling in many decision-making paradigms, while keeping additional model complexity and assumptions minimal.

## Materials and methods

### Mathematical and algorithmic formulations of static and dynamic noise estimation

In a sequential decision-making task, the data collected include observation-action pairs  $(o_t, a_t)$  over the learning trajectory for time  $t = 1, 2, \dots, T$ . In a reinforcement learning task, reward  $r_t$  is additionally collected. We assume that choices are generated by a Markov decision process [44]. The decision-making model leads to a policy  $\pi(a|o)$  that the agent uses to choose between discrete actions given the observation. The policy may include noise mechanisms, such as using the softmax function for action selection, and it is conditional on the model's latent variables and parameters (e.g., learned values and learning rates for reinforcement learning models). We describe two extensions of such a decision model: the static noise estimation method that implements the classic  $\epsilon$ -mechanism [20] and the new dynamic noise estimation method. The parameters,  $\theta$ , of both extended models can be optimized by maximizing the likelihood of the data given the model parameters, denoted as  $\mathcal{L}(\theta)$ . In this section, we focus only on the policy part of the models; all other model equations (such as reinforcement learning value updates) are taken from the published models and reported in S1 Appendix.

#### Static noise estimation

Static noise policies assume that decision noise is at a constant level  $\epsilon$  throughout the learning trajectory. At any time  $t$ , from the set of available actions  $A$ , the agent samples an action uniformly at random (with probability  $\epsilon$ ) or based on the learned policy (with probability  $1 - \epsilon$ ). Static noise estimation can be incorporated into likelihood estimation according to Algorithm 1. Thus, any model that can be fitted with likelihood-dependent methods can incorporate static noise into its policy.

---

**Algorithm 1:** Static noise estimation likelihood computation

---

```
Initialize  $L(\theta) = 0$ ;  
for  $t = 1, 2, \dots, T$  do  
    Calculate the action probability  $\pi_t(a_t|o_t)$  ;  
     $L(\theta) \leftarrow L(\theta) + \log[\epsilon \cdot \frac{1}{|A|} + (1 - \epsilon) \cdot \pi_t(a_t|o_t)]$  ;  
    Update the policy with  $(o_t, a_t, r_t)$ .  
end
```

---

#### Dynamic noise estimation

The dynamic noise estimation method models decision noise by assuming that the agent is in one of two latent states at any given time: the *random state* in which the agent chooses actions uniformly at random or the *engaged state* in which decisions are made according to the true model policy. The transitions between both states are governed by two parameters:  $T_0^1$  and  $T_1^0$ , the probabilities of transitioning from the random state to the engaged state and vice versa. From these transition probabilities, we can calculate the stay probability for each latent state:  $1 - T_0^1$  for the random state and  $1 - T_1^0$  for the engaged state.

The state is composed of an observation  $o_t$ , often encoding the stimulus, and unobserved, latent variables including the learned policy and  $h_t$ , where  $h_t \in \{0, 1\}$  indicates whether the agent is in the random state or engaged state at time  $t$ . It is further assumed that  $r_t$  and  $o_t$  are conditionally independent of the latent states up to

time  $t$  given the observed data history, since rewards and future observations in behavioral experiments do not depend on subjects' unobserved mental states.

Our goal is to maximize the following log-likelihood:

$$\begin{aligned}\mathcal{L}(\theta) &= \sum_{t=1}^T \log \mathbb{P}(a_t | o_t, \bar{o}_{t-1}; \theta) \\ &= \sum_{t=1}^T \log \mathbb{P}\left(\sum_i \mathbb{P}(a_t | o_t, h_t = i; \theta) \mathbb{P}(h_t = i | \bar{o}_{t-1}; \theta)\right),\end{aligned}\tag{1}$$

where  $\bar{o}_{t-1}$  denotes the observation-action-reward triplets up to time  $t-1$ . The probability on the right of Eq 1, the prediction probability of being in the latent state  $i \in \{0, 1\}$  at time  $t$ , is not trivial to compute. Denoting it as  $\lambda_t(i)$ , we have

$$\begin{aligned}\lambda_t(i) &= \mathbb{P}(h_t = i | \bar{o}_{t-1}; \theta) \\ &= \sum_j \mathbb{P}(h_t = i | h_{t-1} = j, \bar{o}_{t-1}; \theta) \mathbb{P}(h_{t-1} = j | \bar{o}_{t-1}; \theta),\end{aligned}\tag{2}$$

where  $j \in \{0, 1\}$  and

$$\mathbb{P}(h_{t-1} = j | \bar{o}_{t-1}; \theta) = \frac{\mathbb{P}(h_{t-1} = j, a_{t-1}, r_{t-1} | o_{t-1}, \bar{o}_{t-2}; \theta)}{\sum_k \mathbb{P}(h_{t-1} = k, a_{t-1}, r_{t-1} | o_{t-1}, \bar{o}_{t-2}; \theta)}.\tag{3}$$

Notice that for any given  $k$ , each term in the denominator of the right-hand side of Eq 3, as well as the nominator with  $k = j$ , is equal to

$$\mathbb{P}(r_{t-1} | o_{t-1}, a_{t-1}, h_{t-1} = k, \bar{o}_{t-2}; \theta) \times \mathbb{P}(a_{t-1}, h_{t-1} = k | o_{t-1}, \bar{o}_{t-2}; \theta),$$

the first term of which is independent of  $h_{t-1}$  and is, therefore, canceled out between the nominator and denominator in Eq 3. Thus,

$$\mathbb{P}(h_{t-1} = j | \bar{o}_{t-1}; \theta) = \frac{\mathbb{P}(a_{t-1} | h_{t-1} = j, o_{t-1}, \bar{o}_{t-2}; \theta) \mathbb{P}(h_{t-1} = j | \bar{o}_{t-2}; \theta)}{\sum_k \mathbb{P}(a_{t-1} | h_{t-1} = k, o_{t-1}, \bar{o}_{t-2}; \theta) \mathbb{P}(h_{t-1} = k | \bar{o}_{t-2}; \theta)}.\tag{4}$$

We can now compute  $\lambda_t(i)$  by plugging Eq 4 into Eq 2, which then allows us to calculate  $\mathcal{L}(\theta)$  by plugging Eq 2 into Eq 1. The probabilities needed to infer  $\lambda_t(i)$  and  $\mathcal{L}(\theta)$  can be iteratively updated according to Algorithm 2 over the learning trajectory. These calculations can be easily incorporated into fitting procedures based on optimizing the model's likelihood, including maximum likelihood estimation and hierarchical Bayesian modeling.

---

**Algorithm 2:** Dynamic noise estimation likelihood computation

---

Initialize  $L(\theta) = 0$  and  $\lambda_0(i)$  for  $i \in \{0, 1\}$  ;

**for**  $t = 1, 2, \dots, T$  **do**

Calculate the action probability  $\pi_t(a_t | o_t)$  ;

$$l_t(\theta) = \log\left[\frac{1}{|A|} \cdot \lambda_{t-1}(0) + \pi_t(a_t | o_t) \cdot \lambda_{t-1}(1)\right] ;$$

$$L(\theta) \leftarrow L(\theta) + l_t(\theta) ;$$

$$\lambda_t(h) \leftarrow \frac{\frac{1}{|A|} \cdot \lambda_{t-1}(0) \cdot T_0^h + \pi_t(a_t | o_t) \cdot \lambda_{t-1}(1) \cdot T_1^h}{\exp(l_t(\theta))} \text{ for } h \in \{0, 1\} ;$$

Update the policy with  $(o_t, a_t, r_t)$ .

**end**

---

## The relationship between static and dynamic noise estimation

Static noise estimation can be formulated under the binary latent state assumption of dynamic noise estimation (Fig 1B), with the additional constraint that the probability of transitioning into each latent state is independent from the current state:

$$T_0^1 + T_1^0 = 1. \quad (5)$$

In other words, the probabilities of transitioning to the random state from the engaged state must be equal to the probability of transitioning to the random state from the random state:

$$T_1^0 = \epsilon = 1 - T_0^1.$$

Similarly, the probabilities of transitioning into the engaged state from the random state and the engaged state must be equal:

$$T_0^1 = 1 - \epsilon = 1 - T_1^0.$$

Both the above relationships can be summarized by Eq 5.

Therefore, static noise estimation is a special case of dynamic noise estimation with an additional assumption described by Eq 5, as illustrated in Fig 1C. It can also be experimentally verified that dynamic noise estimation converges to static noise estimation once this constraint is added to the model-fitting procedure (results not included).

Theoretically, with optimal parameters, the likelihood estimates made by the dynamic noise estimation model must be no worse than those made by the static noise estimation model. In practice, this relationship may not hold if the optimizer fails to converge to the global minimum when fitting the dynamic model. However, this issue can be circumvented by initializing the parameter values of the dynamic model to the best fit parameters of the static model (e.g.,  $T_1^0$  as  $\hat{\epsilon}$  and  $T_0^1$  as  $1 - \hat{\epsilon}$ ).

## Analysis methods

### Simulation setup

The task environment in which the data were simulated for the theoretical analyses had two alternative choices with asymmetrical reward probabilities (80% and 20%) that reversed every episode. Each agent was simulated for 10 episodes with 50 trials per episode. The simulations with lapses included data from 3,000 individuals generated by the model with the static noise mechanism (Fig 2). Model parameters were sampled uniformly between reasonable bounds: learning rate  $\sim$  Uniform(0, 0.6), stickiness  $\sim$  Uniform(-0.3, 0.3), and  $\epsilon \sim$  Uniform(0, 0.2). For each individual, we simulated a lapse into random choice behavior whose duration was sampled uniformly at random between 0 and the length of the experiment (500 trials). During the lapse, the agent was forced to randomly choose between the two available actions. In the analyses shown in Fig 3, we simulated data of 1,000 individuals using the model with the dynamic noise mechanism. The parameters were sampled from the following distributions: learning rate  $\sim$  Beta(3, 10), stickiness  $\sim$  Normal(0, 0.1),  $T_1^0 \sim$  Beta(1, 15), and  $T_0^1 \sim$  Beta(1, 15). Both models were fitted to the simulated data per individual.

### Empirical datasets and models

All empirical data were downloaded from sources made publicly available by the authors of the corresponding research articles. The data of all individuals were included except

that for the IGT dataset [27], we selected for the studies that used the 100-trial versions of the task. For the Dynamic Foraging (n=48) [26] and 2-step (n=151) [30] datasets, the winning models from the original papers were used in our analyses. Since the article containing the IGT dataset (n=504) [27] did not report modeling results, we tested the winning model from later work [28] on the data from the same individuals included in the current work. For the RLWM dataset (n=91) [29], we implemented the best known version of the RLWM model [36] with an additional stickiness parameter, which improved model fit significantly. The mathematical formulation of the models can be found in S1 Appendix.

### Model-fitting

All models were fitted using the maximum likelihood estimation procedure at the individual level using the MATLAB global optimization toolbox with the `fmincon` function. Although hierarchical Bayesian methods may have yielded better model fit, we chose to use maximum likelihood estimation because it is simple, efficient, and suffices for our purpose of demonstrating the comparison between the static and dynamic noise models. In practice, we advise users of our dynamic noise estimation method to apply the fitting procedure with the most appropriate assumptions for the model and data.

### Model validation and recovery

In model validation, we simulated choice behavior for each subject repeatedly (e.g., for 100 times) using the maximum likelihood parameters obtained from model-fitting. For simulations with dynamic noise estimation, we used the latent state probability  $-\lambda(0)$  and  $\lambda(1)$  – trajectories inferred from real data to simulate latent state occupancy. To validate how well the models captured behavior, we compared behavioral signatures (e.g., learning curves) between these model simulations and the data (real or simulated) that the models were fitted to.

The recovery of the prediction probabilities of model latent states was performed by simulating data 30 times per individual using best fit parameters and inferring prediction probabilities from these data. Model parameters were recovered by first simulating behavior using best fit parameters and re-fitting the model to the simulated behavior to estimate parameter values. All recovery was performed at the individual level.

### Data and code availability

All data and code will be made publicly available upon publication.

## References

1. Palminteri, S., Wyart, V. & Koechlin, E. The importance of falsification in computational cognitive modeling. *Trends In Cognitive Sciences*. **21**, 425-433 (2017)
2. Wilson, R. & Collins, A. Ten simple rules for the computational modeling of behavioral data. *Elife*. **8** pp. e49547 (2019)
3. Kass, R. & Raftery, A. Bayes factors. *Journal Of The American Statistical Association*. **90**, 773-795 (1995)

4. Eckstein, M., Master, S., Xia, L., Dahl, R., Wilbrecht, L. & Collins, A. The interpretation of computational model parameters depends on the context. *Elife*. **11** pp. e75474 (2022)
5. Lee, M. & Webb, M. Modeling individual differences in cognition. *Psychonomic Bulletin & Review*. **12**, 605-621 (2005)
6. Huys, Q., Browning, M., Paulus, M. & Frank, M. Advances in the computational understanding of mental illness. *Neuropsychopharmacology*. **46**, 3-19 (2021)
7. Tversky, A. & Kahneman, D. Advances in prospect theory: Cumulative representation of uncertainty. *Journal Of Risk And Uncertainty*. **5**, 297-323 (1992)
8. Bitzer, S., Park, H., Blankenburg, F. & Kiebel, S. Perceptual decision making: drift-diffusion model is equivalent to a Bayesian model. *Frontiers In Human Neuroscience*. **8** pp. 102 (2014)
9. Dayan, P. & Niv, Y. Reinforcement learning: the good, the bad and the ugly. *Current Opinion In Neurobiology*. **18**, 185-196 (2008)
10. Esterman, M. & Rothlein, D. Models of sustained attention. *Current Opinion In Psychology*. **29** pp. 174-180 (2019)
11. Warm, J., Parasuraman, R. & Matthews, G. Vigilance requires hard mental work and is stressful. *Human Factors*. **50**, 433-441 (2008)
12. Wilson, R., Geana, A., White, J., Ludvig, E. & Cohen, J. Humans use directed and random exploration to solve the explore-exploit dilemma.. *Journal Of Experimental Psychology: General*. **143**, 2074 (2014)
13. Findling, C. & Wyart, V. Computation noise in human learning and decision-making: origin, impact, function. *Current Opinion In Behavioral Sciences*. **38** pp. 124-132 (2021)
14. Sutton, R. & Barto, A. Reinforcement learning: An introduction. (MIT press,2018)
15. Chapelle, O. & Li, L. An empirical evaluation of thompson sampling. *Advances In Neural Information Processing Systems*. **24** (2011)
16. Thompson, W. On the likelihood that one unknown probability exceeds another in view of the evidence of two samples. *Biometrika*. **25**, 285-294 (1933)
17. Wang, S. & Wilson, R. Any way the brain blows? The nature of decision noise in random exploration. (PsyArXiv,2018)
18. Daw, N. & Tobler, P. Value learning through reinforcement: the basics of dopamine and reinforcement learning. *Neuroeconomics*. pp. 283-298 (2014)
19. Collins, A. & Frank, M. How much of reinforcement learning is working memory, not reinforcement learning? A behavioral, computational, and neurogenetic analysis. *European Journal Of Neuroscience*. **35**, 1024-1035 (2012)
20. Nassar, M. & Frank, M. Taming the beast: extracting generalizable knowledge from computational models of cognition. *Current Opinion In Behavioral Sciences*. **11** pp. 49-54 (2016)



21. Schaaf, J., Jepma, M., Visser, I. & Huizenga, H. A hierarchical Bayesian approach to assess learning and guessing strategies in reinforcement learning. *Journal Of Mathematical Psychology*. **93** pp. 102276 (2019)
22. Group, T., Fawcett, T., Fallenstein, B., Higginson, A., Houston, A., Mallpress, D., Trimmer, P. & McNamara, J. The evolution of decision rules in complex environments. *Trends In Cognitive Sciences*. **18**, 153-161 (2014)
23. Fisher, R. On the mathematical foundations of theoretical statistics. *Philosophical Transactions Of The Royal Society Of London. Series A, Containing Papers Of A Mathematical Or Physical Character*. **222**, 309-368 (1922)
24. Piray, P., Dezfouli, A., Heskes, T., Frank, M. & Daw, N. Hierarchical Bayesian inference for concurrent model fitting and comparison for group studies. *PLoS Computational Biology*. **15**, e1007043 (2019)
25. Izquierdo, A., Brigman, J., Radke, A., Rudebeck, P. & Holmes, A. The neural basis of reversal learning: an updated perspective. *Neuroscience*. **345** pp. 12-26 (2017)
26. Grossman, C., Bari, B. & Cohen, J. Serotonin neurons modulate learning rate through uncertainty. *Current Biology*. **32**, 586-599 (2022)
27. Steingroever, H., Fridberg, D., Horstmann, A., Kjome, K., Kumari, V., Lane, S., Maia, T., McClelland, J., Pachur, T., Premkumar, P. & Others Data from 617 healthy participants performing the Iowa gambling task: A” many labs” collaboration. *Journal Of Open Psychology Data*. **3**, 340-353 (2015)
28. Ligneul, R. Sequential exploration in the Iowa gambling task: validation of a new computational model in a large dataset of young and old healthy participants. *PLoS Computational Biology*. **15**, e1006989 (2019)
29. Collins, A. The tortoise and the hare: Interactions between reinforcement learning and working memory. *Journal Of Cognitive Neuroscience*. **30**, 1422-1432 (2018)
30. Nussenbaum, K., Scheuplein, M., Phaneuf, C., Evans, M. & Hartley, C. Moving developmental research online: comparing in-lab and web-based studies of model-based reinforcement learning. *Collabra: Psychology*. **6** (2020)
31. Akaike, H. A new look at the statistical model identification. *IEEE Transactions On Automatic Control*. **19**, 716-723 (1974)
32. Rigoux, L., Stephan, K., Friston, K. & Daunizeau, J. Bayesian model selection for group studies—revisited. *Neuroimage*. **84** pp. 971-985 (2014)
33. Ashwood, Z., Roy, N., Stone, I., Laboratory, I., Urai, A., Churchland, A., Pouget, A. & Pillow, J. Mice alternate between discrete strategies during perceptual decision-making. *Nature Neuroscience*. **25**, 201-212 (2022)
34. Aston-Jones, G., Rajkowski, J. & Cohen, J. Role of locus coeruleus in attention and behavioral flexibility. *Biological Psychiatry*. **46**, 1309-1320 (1999)
35. Berridge, C. & Waterhouse, B. The locus coeruleus–noradrenergic system: modulation of behavioral state and state-dependent cognitive processes. *Brain Research Reviews*. **42**, 33-84 (2003)
36. Master, S., Eckstein, M., Gotlieb, N., Dahl, R., Wilbrecht, L. & Collins, A. Disentangling the systems contributing to changes in learning during adolescence. *Developmental Cognitive Neuroscience*. **41** pp. 100732 (2020)

37. Trach, J., DeBettencourt, M., Radulescu, A. & McDougle, S. Reward prediction errors modulate attentional vigilance. (PsyArXiv,2022)
38. Botvinick, M., Braver, T., Barch, D., Carter, C. & Cohen, J. Conflict monitoring and cognitive control.. *Psychological Review*. **108**, 624 (2001)
39. Laeng, B., Sirois, S. & Gredebäck, G. Pupillometry: A window to the preconscious?. *Perspectives On Psychological Science*. **7**, 18-27 (2012)
40. Polich, J. Updating P300: an integrative theory of P3a and P3b. *Clinical Neurophysiology*. **118**, 2128-2148 (2007)
41. Huys, Q., Maia, T. & Frank, M. Computational psychiatry as a bridge from neuroscience to clinical applications. *Nature Neuroscience*. **19**, 404-413 (2016)
42. Barkley, R. Behavioral inhibition, sustained attention, and executive functions: constructing a unifying theory of ADHD.. *Psychological Bulletin*. **121**, 65 (1997)
43. Auer, P., Cesa-Bianchi, N. & Fischer, P. Finite-time analysis of the multiarmed bandit problem. *Machine Learning*. **47** pp. 235-256 (2002)
44. Puterman, M. L. (2014). Markov decision processes: discrete stochastic dynamic programming. John Wiley & Sons.

## Supporting information

S1 Fig.

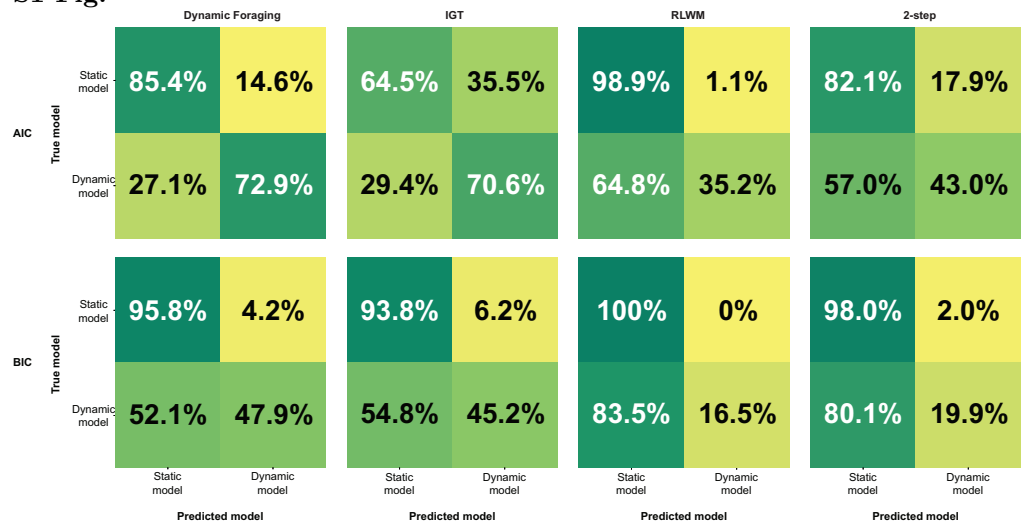

**Model identification using AIC and BIC.** We performed model identification validation with confusion matrices [2]. To do so, we simulated data with parameters fitted to subjects' data. The AIC metric yielded better model identification than BIC. We note that simulations of the dynamic noise model were often mis-classified as being generated by the static noise model in RLWM and 2-step datasets. This is because most subjects in these datasets did not benefit substantially from dynamic noise estimation, and the parameters inferred made the dynamic noise model very similar to the static noise model. Thus, simulated behavior was in a range where both models were indistinguishable (since the static noise model is nested in the dynamic one). In these cases, the trivial improvements on likelihoods would be insufficient to offset the penalty incurred by the extra parameter in the dynamic model.

S2 Fig.

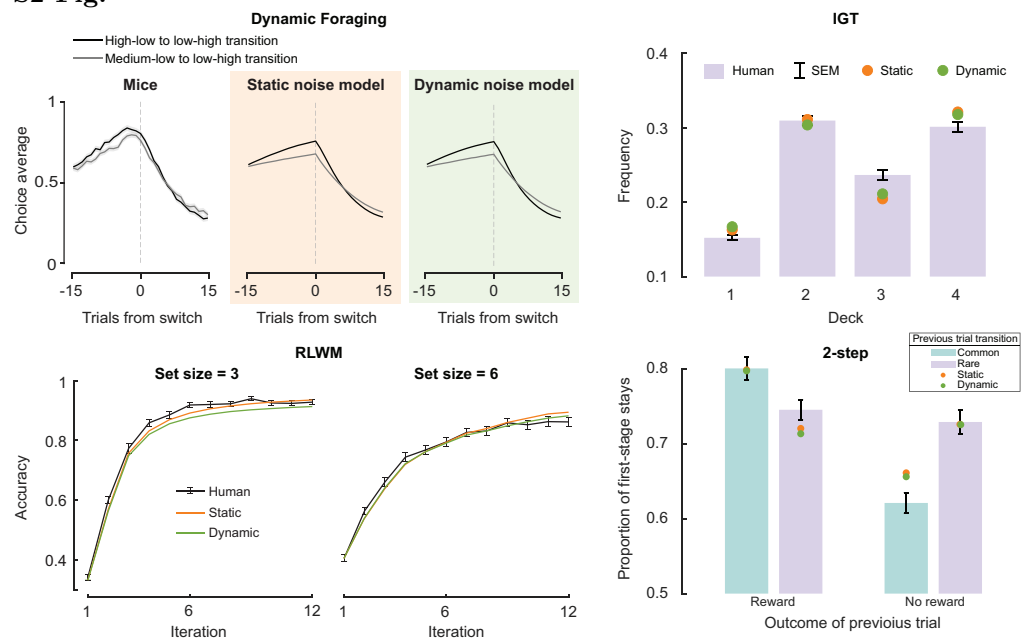

**Model validation results on the empirical datasets.** Dynamic noise estimation did not alter the qualitative behavioral predictions made by the models.

**S3 Fig.**

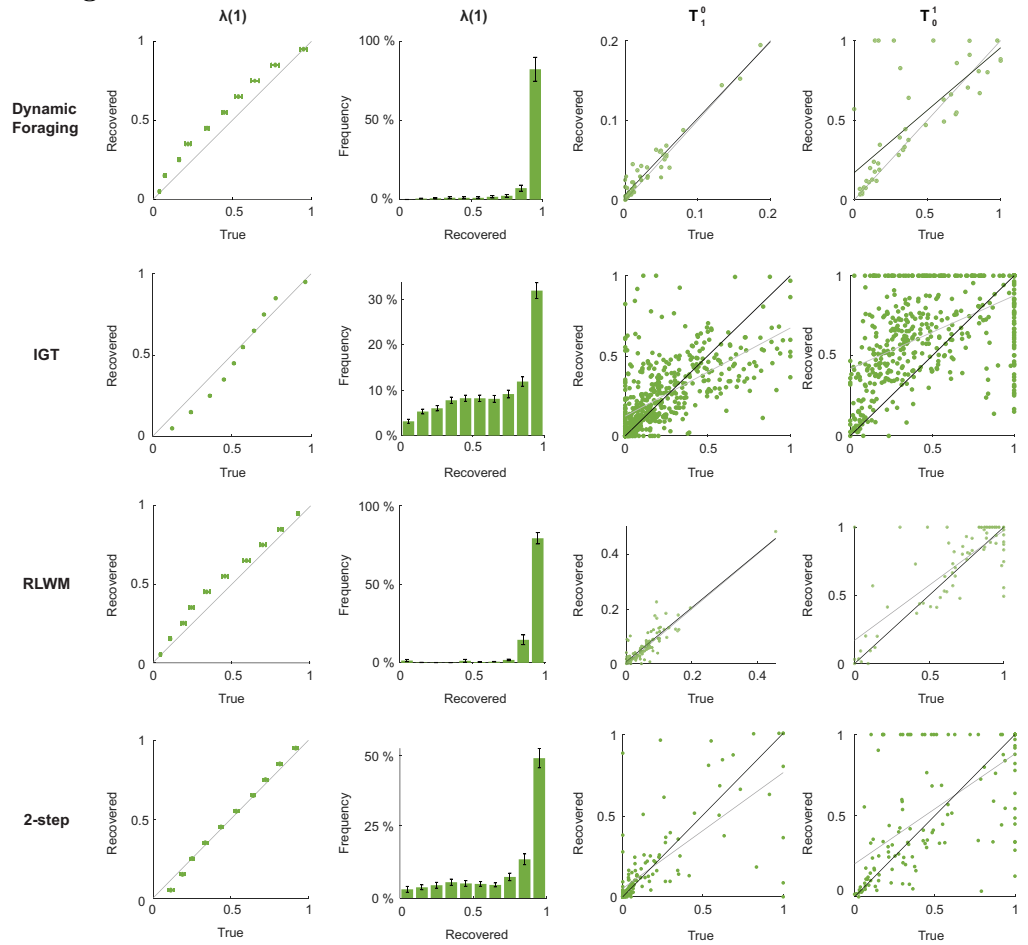

**Recovery of latent state prediction probability and noise parameters.**  $\lambda(1)$  recovered well across datasets, with most recovered values between 0.9 and 1.  $T_1^0$  recovery was robust overall, while  $T_0^1$  recovered inadequately. This is because the lack of data in the random state led to insufficient potential transitions from the random to engaged state, which under-powered  $T_0^1$  recovery.

S4 Fig.

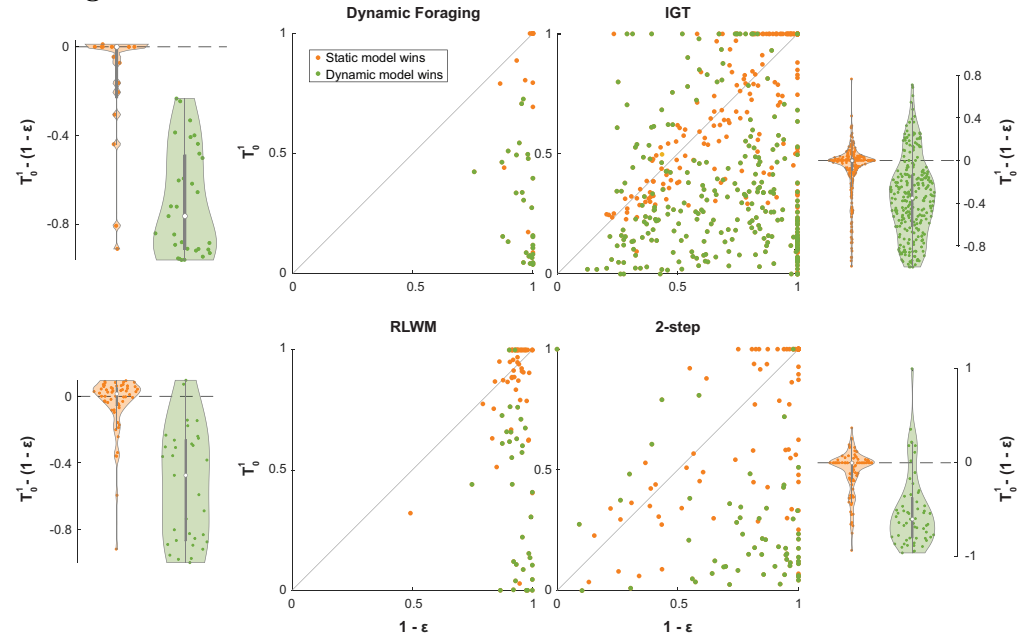

Improved fit by dynamic noise estimation is correlated to decreased estimation of the transition probability from the the random to engaged state.

**S1 Appendix. Model equations.** The mathematical formulations of all models used on the datasets presented in the current work.

### Probabilistic Reversal

The model for the Probabilistic Reversal environment consists of 2 free parameters:  $\alpha$  (learning rate) and  $\phi$  (choice stickiness). The softmax inverse temperature is fixed at  $\beta = 8$ .

On trial  $t$ , the choice is made according to action probabilities computed through the softmax function. For example, the probability of choosing the left action is:

$$P_t(l) = \frac{1}{1 + \exp\left(\beta \cdot (Q_t(r) - Q_t(l) - \phi \cdot \mathbb{1}_{a_{t-1}}[l])\right)},$$

where  $\mathbb{1}_{a_{t-1}}[l]$  takes on the value of 1 if  $a_{t-1} = l$  and -1 otherwise.

Once the reward  $r_t$  has been observed, the action values are updated:

$$Q_{t+1}(a_t) = Q_t(a_t) + \alpha \cdot (r_t - Q_t(a_t)).$$

### Dynamic Foraging

The meta-learning model in the original paper was implemented [26]. The model has 7 parameters:  $\beta$  (softmax inverse temperature), *bias* (for the right action),  $\alpha_{(+)}$  (positive learning rate),  $\alpha_{(-)_0}$  (baseline negative learning rate),  $\alpha_v$  (rate of RPE magnitude integration),  $\psi$  (meta-learning rate for unexpected uncertainty), and  $\xi$  (forgetting rate).

On trial  $t$ , a decision is sampled from choice probabilities obtained through a softmax decision function applied to the action values of the left and right actions:

$$P_t(l) = \frac{1}{1 + \exp\left(\beta \cdot (Q_t(r) - Q_t(l) + bias)\right)}$$

and

$$P_t(r) = 1 - P_t(l).$$

Once the reward is observed, assuming the left action is chosen, its value is updated as follows:

$$Q_{t+1}(l) = Q_t(l) + \alpha_t \cdot \delta_t \cdot (1 - E_t),$$

where  $\alpha_t$  is  $\alpha_{(+)}$  if the reward-prediction error (RPE),  $\delta_t = R_t - Q_t(l)$ , is positive, and  $\alpha_{(-)_t}$  otherwise.  $E_t$  is an evolving estimate of expected uncertainty calculated from the history of absolute RPEs:

$$E_{t+1} = E_t + \alpha_v \cdot v_t,$$

where

$$v_t = |\delta_t| - E_t.$$

When the RPE is negative, the negative learning rate is dynamically adjusted and lower-bounded by 0:

$$\alpha_{(-)_t} = \max\left(0, \psi \cdot (v_t + \alpha_{(-)_0}) + (1 - \psi) \cdot \alpha_{(-)_{t-1}}\right)$$

Finally, the unchosen action (e.g., right) is forgotten:

$$Q_{t+1}(r) = \xi \cdot Q_t(r).$$

## IGT

The Value plus Sequential Exploration model [28] was implemented for the IGT dataset. The model is defined by 5 parameters:  $\alpha$  (learning rate),  $\beta$  (softmax inverse temperature),  $\theta$  (value sensitivity),  $\Delta$  (decay), and  $\phi$  (exploration bonus).

On trial  $t$ , the decision is sampled based on the probability of choosing deck  $d$ :

$$P_t(d) = \frac{\exp\left(\beta \cdot (Explore_t(d) + Exploit_t(d))\right)}{\sum_{i=1}^4 \exp\left(\beta \cdot (Explore_t(i) + Exploit_t(i))\right)},$$

where  $Explore_t(d)$  and  $Exploit_t(d)$  are the action values of deck  $d$  using the exploration and exploitation weights. For the selected deck, their values are updated according to the following equations:

$$Explore_{t+1}(d) = 0$$

and

$$Exploit_{t+1}(d) = \Delta \cdot Exploit_t(d) + v_t,$$

where  $v_t = (Gain_t)^\theta - (Loss_t)^\theta$ . For the unselected decks, the weights are controlled by the following equations:

$$Explore_{t+1}(d) = Explore_t(d) + \alpha \cdot (\phi - Explore_t(d))$$

and

$$Exploit_{t+1}(d) = \Delta \cdot Exploit_t(d).$$

## RLWM

The RLWM model is improved upon previously published versions [29, 36] by the inclusion of a choice stickiness parameter. The model has 6 parameters in total:  $\alpha$  (learning rate),  $bias$  (for negative learning),  $\phi$  (stickiness),  $\rho$  (working memory weight),  $\gamma$  (forgetting rate), and  $K$  (working memory capacity). The softmax inverse temperature parameter is fixed at  $\beta = 20$ .

On trial  $t$ , the probability of choosing an action  $a_t$  in state  $s_t$  is given by a weighted combination between a reinforcement learning policy and a working memory one:

$$P(a_t|s_t) = (1 - w) \cdot P_{RL}(a_t|s_t) + w \cdot P_{WM}(a_t|s_t),$$

where  $w = \rho \cdot \min(1, \frac{K}{NS})$  and  $NS$  is the set size. The action values for both policies are computed as follows:

$$P_{RL}(a_t|s_t) = \frac{\exp\left(\beta \cdot (Q_t(s_t, a_t) + \phi \cdot \mathbb{1}_{a_{t-1}}[a_t])\right)}{\sum_i \exp\left(\beta \cdot (Q_t(s_t, a_i) + \phi \cdot \mathbb{1}_{a_{t-1}}[a_i])\right)}$$

and

$$P_{WM}(a_t|s_t) = \frac{\exp\left(\beta \cdot (WM_t(s_t, a_t) + \phi \cdot \mathbb{1}_{a_{t-1}}[a_t])\right)}{\sum_i \exp\left(\beta \cdot (WM_t(s_t, a_i) + \phi \cdot \mathbb{1}_{a_{t-1}}[a_i])\right)},$$

where  $\mathbb{1}_{a_{t-1}}[a_i]$  is an indicator that takes on the value of 1 if  $a_i = a_{t-1}$  and 0 otherwise.

All working memory values are forgotten on each trial:

$$WM_{t+1} = WM_t + \gamma \cdot \left( \frac{1}{|A|} - WM_t \right),$$

where  $|A|$  is the total number of available actions. The values are then updated according to the following equations:

$$Q_{t+1}(s_t, a_t) = Q_t(s_t, a_t) + \alpha_{RL} \cdot (r_t - Q_t(s_t, a_t))$$

and

$$WM_{t+1}(s_t, a_t) = WM_t(s_t, a_t) + \alpha_{WM} \cdot (r_t - WM_t(s_t, a_t)),$$

where if  $r_t = 1$ ,  $\alpha_{RL} = \alpha$  and  $\alpha_{WM} = 1$ , and if  $r_t = 0$ ,  $\alpha_{RL} = bias \cdot \alpha$  and  $\alpha_{WM} = bias$ .

## 2-step

The 2-step model [30] contains 6 free parameters:  $\alpha$  (learning rate),  $\beta_{MB}$  (softmax inverse temperature for the model-based policy),  $\beta_{MF}$  (softmax inverse temperature for the model-free policy),  $\beta$  (softmax inverse temperature for the second stage),  $\lambda$  (stimulus stickiness), and  $\phi$  (response stickiness).

The first-stage decision is made according to action probabilities computed using both the model-based and model-free action values:

$$P(a_t^1) = \frac{\exp(\beta_{MB} \cdot Q_{MB}(a_t^1) + \beta_{MF} \cdot Q_{MF}(a_t^1) + \phi \cdot \mathbb{1}_{a_{t-1}^1}[a_t^1])}{\sum_i \exp(\beta_{MB} \cdot Q_{MB}(a_i^1) + \beta_{MF} \cdot Q_{MF}(a_i^1) + \phi \cdot \mathbb{1}_{a_{t-1}^1}[a_i^1])},$$

where  $\mathbb{1}_{a_{t-1}^1}[a_t^1]$  is an indicator that takes on the value of 1 if  $a_t^1 = a_{t-1}^1$  and 0 otherwise. The second-stage action probabilities are also computed through the softmax function:

$$P(a_t^2 | s_t^2) = \frac{\exp(\beta \cdot Q_2(s_t^2, a_t^2))}{\sum_i \exp(\beta \cdot Q_2(s_t^2, a_i^2))}.$$

Once the reward  $r_t$  has been observed, the action values are updated as follows:

$$Q_{MF}(a_t^1) \leftarrow Q_{MF}(a_t^1) + \alpha \cdot (Q_2(s_t^2, a_t^2) - Q_{MF}(a_t^1)) + \lambda \cdot \alpha \cdot (r_t - Q_2(s_t^2, a_t^2))$$

and

$$Q_2(s_t^2, a_t^2) \leftarrow Q_2(s_t^2, a_t^2) + \alpha \cdot (r_t - Q_2(s_t^2, a_t^2)).$$

Note that the model-based action values do not need to be updated and can be computed directly:

$$Q_{MB}(a_t^1) \leftarrow \sum_i \max_j (Q_2(s_i^2, a_j^2)) \cdot T_{a_t^1}^{s_i^2},$$

where  $T_{a_t^1}^{s_i^2}$  is the transition probability from the first-stage choice  $a_t^1$  to the second-stage state  $s_i^2$ , which the agent is assumed to know.
